# Supplementary material for: Polyethyleneimine coated Fe3O4 magnetic nanoparticles induce autophagy, NF-κB and TGF-β signaling pathway activation in HeLa cervical carcinoma cells via reactive oxygen species generation
Source: Royal Society of Chemistry journal article supplement (doi:10.1039/c9bm01563a), 2019-10-30
Supplement: c9bm01563a1.pdf [file c9bm01563a1.pdf]

## Supporting Information

**Polyethyleneimine coated Fe<sub>3</sub>O<sub>4</sub> magnetic nanoparticles induce autophagy,  
NF-κB and TGF-β signaling pathways activation in HeLa cervical carcinoma cells  
via reactive oxygen species generation**

Shuli Man,<sup>a</sup> Miao Li,<sup>a</sup> Jin Zhou,<sup>a</sup> Haiyue Wang,<sup>a</sup> Jinyan Zhang,<sup>a</sup> Long Ma<sup>a\*</sup>

<sup>a</sup>. State Key Laboratory of Food Nutrition and Safety, Key Laboratory of Industrial Fermentation Microbiology (Ministry of Education), Tianjin Key Laboratory of Industry Microbiology, School of Biotechnology, Tianjin University of Science & Technology, Tianjin 300457, China.

\*Correspondance should be addressed to Professor Long Ma, Email: malong@tust.edu.cn or woshimalong1983@163.com.

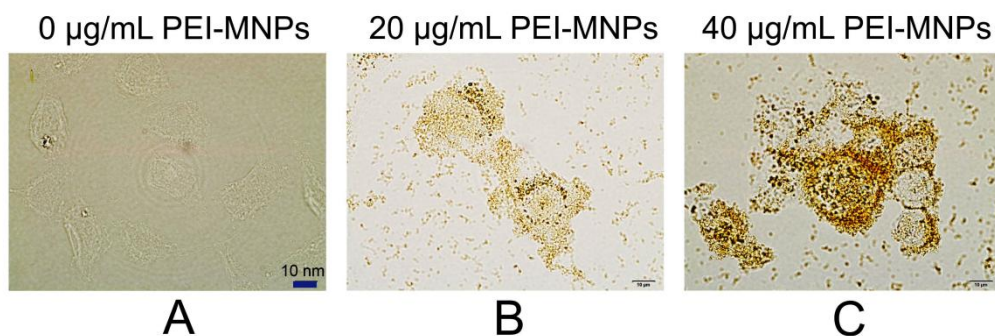

Figure S-1. The uptake of PEI-MNPs of HeLa cells after 24 h treatment.

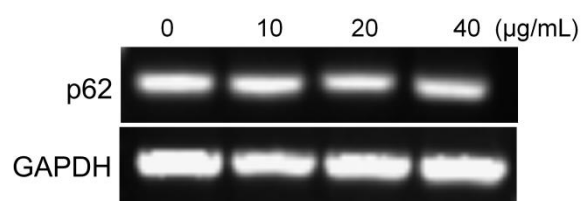

Figure S-2: RT-PCR (reverse transcription polymerase chain reaction) experiment to investigate p62 mRNA level in HeLa cells. The cells were treated with PEI-MNPs for 24 h.

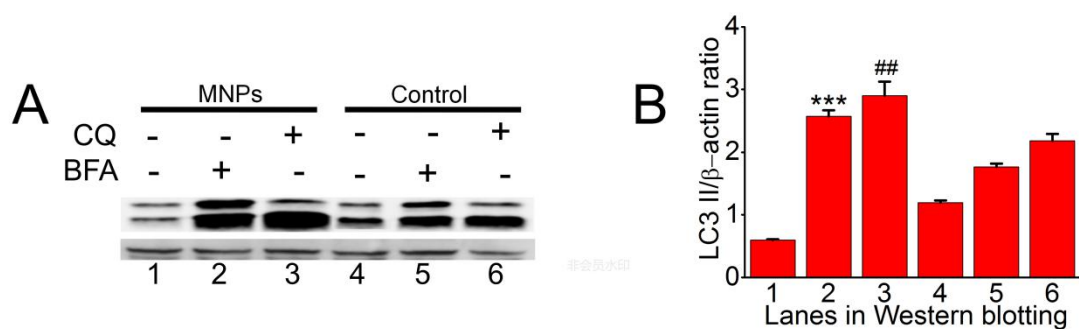

Figure S-3. Results of Western blotting experiments for treatment with different combinations in HeLa cells. A and B: Western blotting results of bafilomycin clamp experiment and quantitative presentation respectively. PEI-MNPs and CQ were used as 15  $\mu\text{g/mL}$ , 20  $\mu\text{M}$  for 24 h. BAF was used at 200 nM for 12 h. Lane 2 vs. 5, \*\*\* $P < 0.005$ ; lane 3 vs. 6, ## $P < 0.01$ .

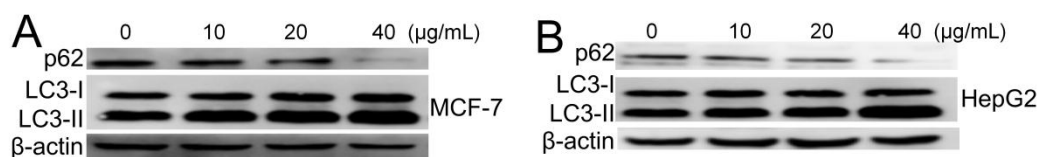

Figure S-4. Western blotting experiments to reveal p62 and LC3 abundance in cancer cells after PEI-MNPs treatment for 24 h. A: Western blotting results for MCF-7 cells. B: Western blotting results for HepG2 cells.

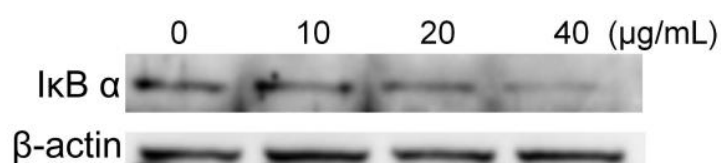

Figure S-5. Western blotting experiments to reveal I $\kappa$ B $\alpha$  abundance in HeLa cells after PEI-MNPs treatment for 24 h.

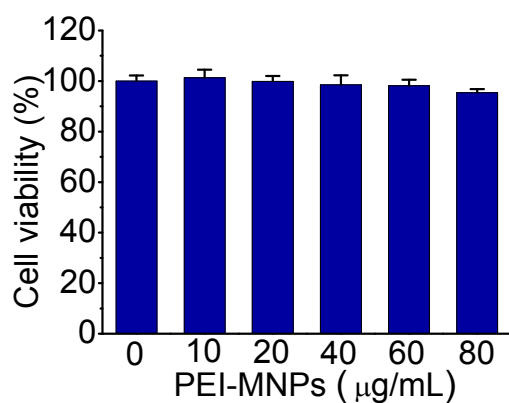

Figure S-6. MTT assay to evaluate the cell viability of HeLa cells treated with different concentrations of PEI-MNPs for 24 h.
